# Supplementary material for: Genome-wide analyses of light-regulated genes in Aspergillus nidulans reveal a complex interplay between different photoreceptors and novel photoreceptor functions
Source: PubMed Central journal article supplement (PMC8535378; doi:10.1371/journal.pgen.1009845), 2021-10-22
Supplement: pgen.1009845.s001.pdf [file pgen.1009845.s001.pdf]

## Supporting information

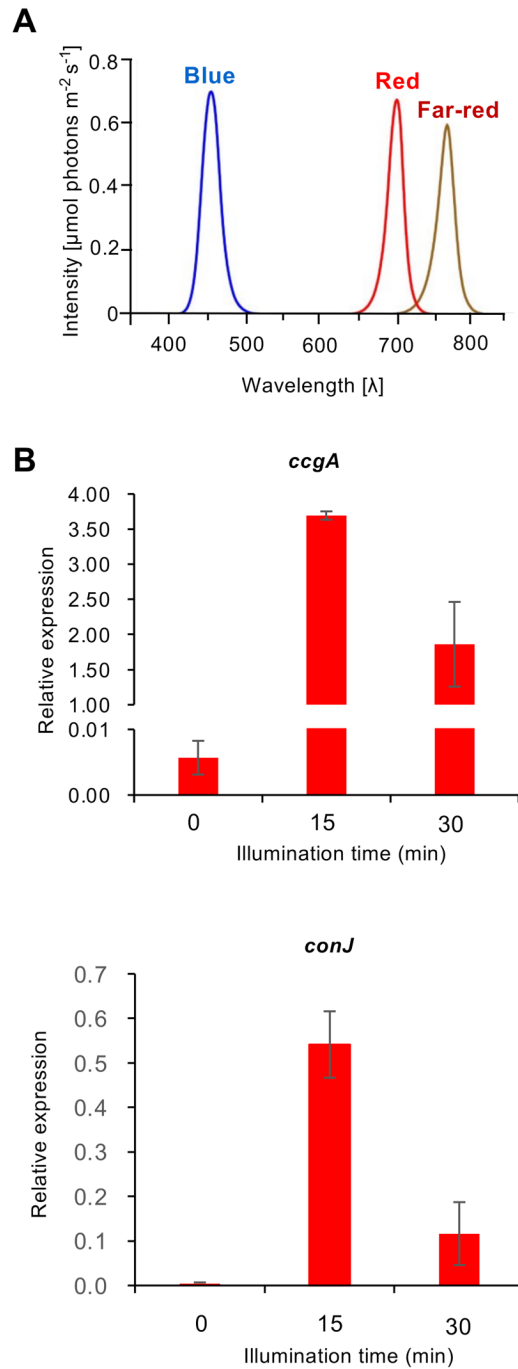

**Fig. S1: Red-light dependent gene induction.** (A) The quality of the LEDs was measured by JAZ-COMBO S/N:JAZA0503 with a QP400-1-VIS-NIR and CC-3-UV-S spectrometer unit by Ocean Optics. (B) Expression analysis of *ccgA* and *ccgB* at different time points by real-time PCR. Fresh conidia of the wild type strain (SJR2) were inoculated on the surface of supplemented liquid minimal medium (2 % glucose) and cultured for 18 hours at 37 °C in the dark. Afterwards, red light ( $1.7 \mu\text{mol photons m}^{-2} \text{s}^{-1}$ ) was imposed for 15 min or 30 min before RNA isolation. The expression of *ccgA* and *ccgB* was normalized to the *h2b* gene. The error bar was calculated from three biological replicates.
