# Supplementary material for: Genome-wide analyses of light-regulated genes in Aspergillus nidulans reveal a complex interplay between different photoreceptors and novel photoreceptor functions
Source: PubMed Central journal article supplement (PMC8535378; doi:10.1371/journal.pgen.1009845), 2021-10-22
Supplement: pgen.1009845.s002.pdf [file pgen.1009845.s002.pdf]

## Supporting information

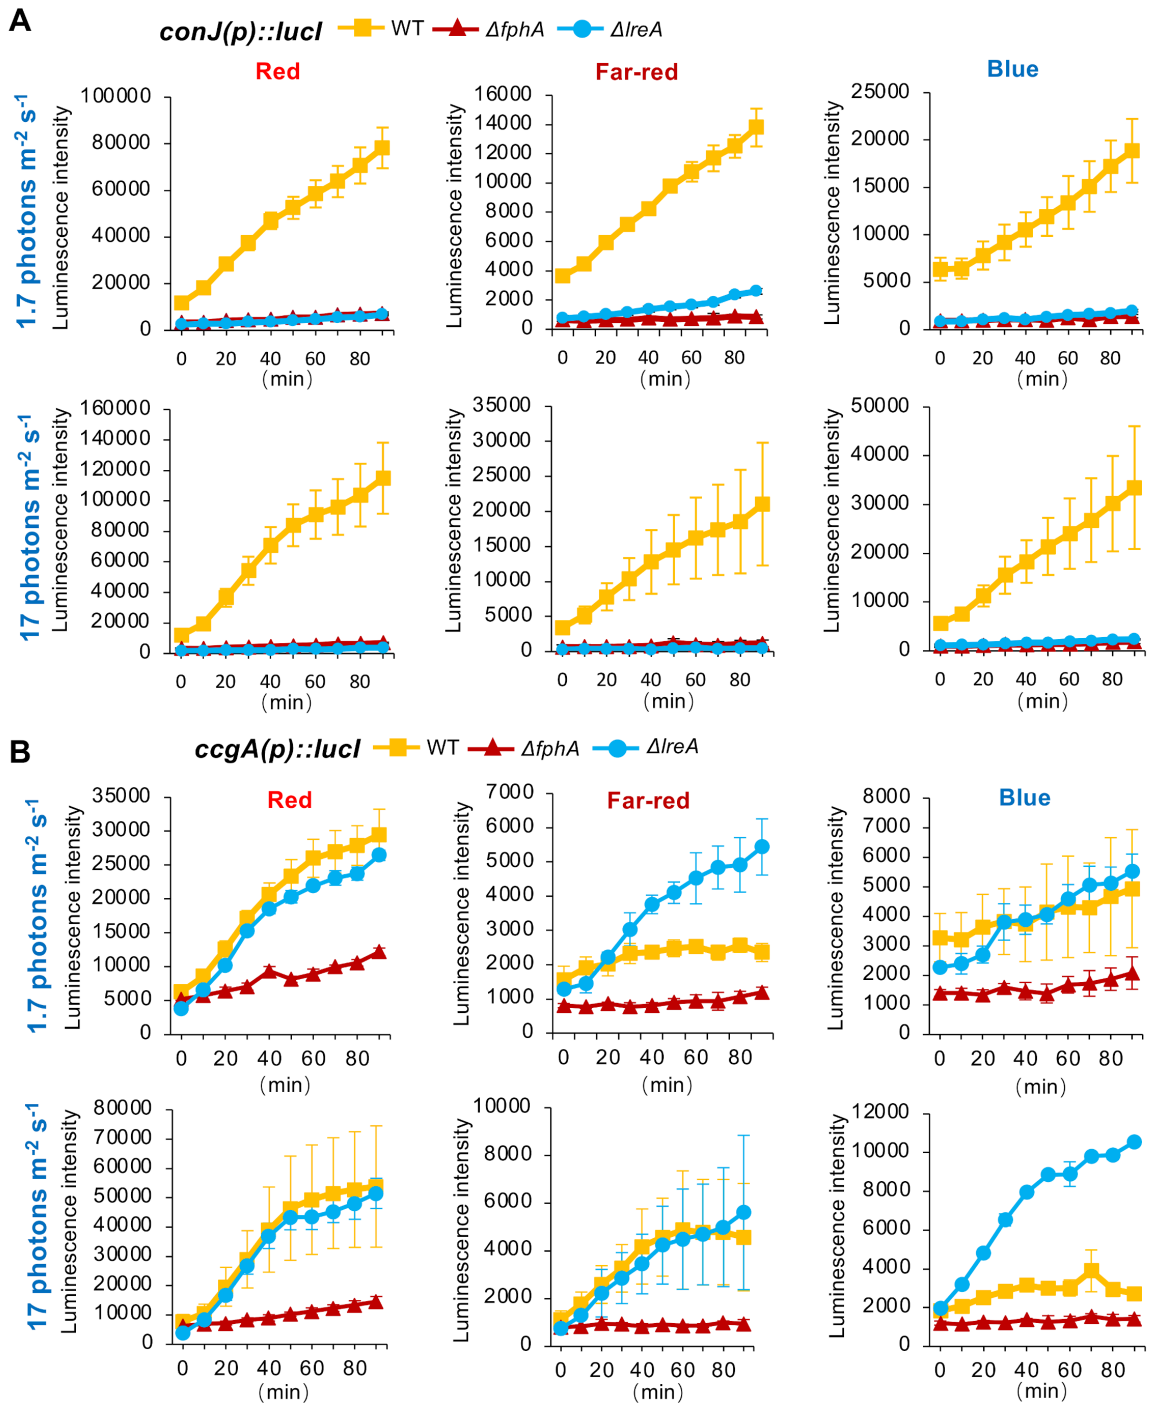

**Fig. S2: Luciferase-based reporter assay as described in Fig. 1 at different scales.**
