# Supplementary material for: Genome-wide analyses of light-regulated genes in Aspergillus nidulans reveal a complex interplay between different photoreceptors and novel photoreceptor functions
Source: PubMed Central journal article supplement (PMC8535378; doi:10.1371/journal.pgen.1009845), 2021-10-22
Supplement: pgen.1009845.s005.pdf [file pgen.1009845.s005.pdf]

## Supporting information

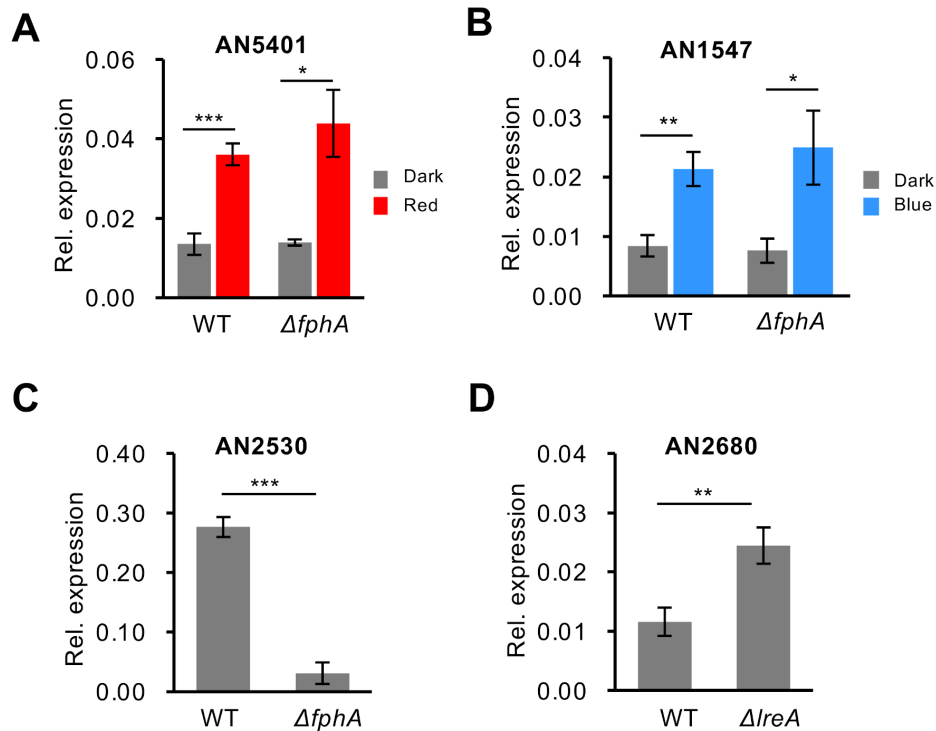

**Fig. S5: Validation of the expression of some genes. (A)** Red light induction of AN5401 was independent of FphA. **(B)** Blue light induction of AN1547 was independent of FphA. **(C)** Expression of AN2530 was downregulated in the *fphA*-deletion strain. **(D)** Expression of AN2680 was upregulated in *lreA*-deletion strain. Red or blue light was imposed for 15 min. The expression level was normalized to *h2b*. The error bar was calculated from three biological replicates. Significant differences were calculated using the two-sample *t*-test (\* $P < 0.05$ , \*\* $P < 0.01$  and \*\*\* $P < 0.001$ ).
