# Supplementary material for: Genome-wide analyses of light-regulated genes in Aspergillus nidulans reveal a complex interplay between different photoreceptors and novel photoreceptor functions
Source: PubMed Central journal article supplement (PMC8535378; doi:10.1371/journal.pgen.1009845), 2021-10-22
Supplement: pgen.1009845.s006.pdf [file pgen.1009845.s006.pdf]

## Supporting information

**A**

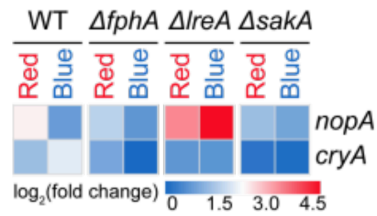

**B**

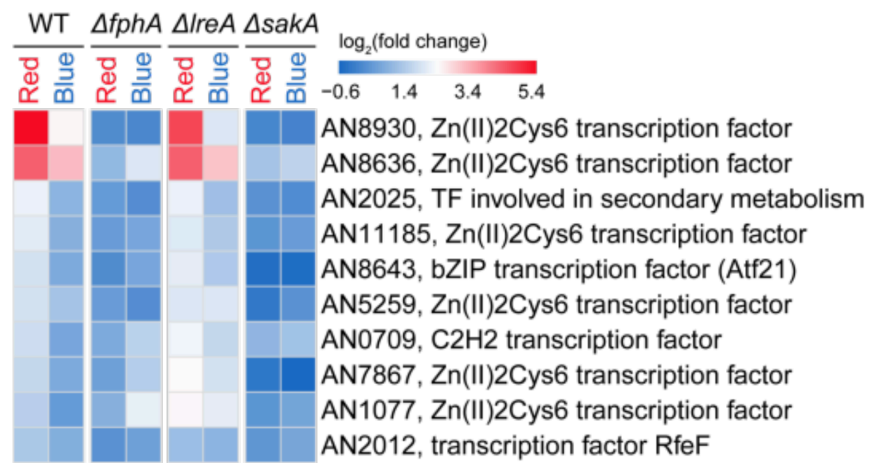

**Fig. S6: Heatmap of *nopA*, *cryA* (A), top 10 light-regulated transcription factors (B) upon red and blue light in different strains.** The colors of heatmap represent log<sub>2</sub>(fold change) of DEGs. Range of log<sub>2</sub>(fold change) is indicated in the color bar.
